# Supplementary material for: Exploring the effect of partial B-site Al3+–Mg2+ dual substitution on optoelectronic, surface, and photocatalytic properties of BaTaO2N
Source: Royal Society of Chemistry journal article supplement (doi:10.1039/d2ma00611a), 2022-01-01
Supplement: d2ma00611a1.pdf [file d2ma00611a1.pdf]

# Electronic Supplementary Information

## Exploring the Effect of *B*-Site Al<sup>3+</sup>-Mg<sup>2+</sup> Dual Substitution on Optoelectronic, Surface, and Photocatalytic Properties of BaTaO<sub>2</sub>N†

Mirabbos Hojamberdiev<sup>1,2\*</sup>, Ronald Vargas<sup>3,4</sup>, Zukhra C. Kadirova<sup>5,6</sup>, Katsuya Teshima<sup>2,7</sup>, and Martin  
Lerch<sup>1</sup>

<sup>1</sup>*Institut für Chemie, Technische Universität Berlin, Straße des 17. Juni 135, 10623 Berlin, Germany*

<sup>2</sup>*Department of Materials Chemistry, Shinshu University, Nagano 380-8553, Japan*

<sup>3</sup>*Instituto Tecnológico de Chascomús (INTECH) - Consejo Nacional de Investigaciones Científicas y  
Técnicas (CONICET) / Universidad Nacional de San Martín (UNSAM). Avenida Intendente Marino,  
Km 8,2, (B7130IWA), Chascomús, Provincia de Buenos Aires, Argentina*

<sup>4</sup>*Escuela de Bio y Nanotecnologías, Universidad Nacional de San Martín (UNSAM). Avenida  
Intendente Marino, Km 8,2, (B7130IWA), Chascomús, Provincia de Buenos Aires, Argentina*

<sup>5</sup>*Department of Inorganic Chemistry, National University of Uzbekistan, 100174 Tashkent, Uzbekistan*

<sup>6</sup>*Uzbekistan-Japan Innovation Center of Youth, University Street 2B, 100095 Tashkent, Uzbekistan*

<sup>7</sup>*Research Initiative for Supra-Materials, Shinshu University, 4-17-1 Wakasato, Nagano 380-8553,  
Japan*

---

\*Corresponding author: E-mail addresses: khujamberdiev@tu-berlin.de and hmirabbos@gmail.com  
(M. Hojamberdiev)

**Table S1.** Al:Mg-(co)substituted BaTaO<sub>2</sub>N configurations at the total substituent content of 50 at.%, corresponding chemical compositions, structural parameters, and band gap values calculated by DFT-HSE12s.

| Designation                    | Chemical compositions                                                           | Lattice constants<br><i>a b c</i> , Å | Cell volume<br><i>V</i> , Å <sup>3</sup> | Band gap, eV              |
|--------------------------------|---------------------------------------------------------------------------------|---------------------------------------|------------------------------------------|---------------------------|
| BTON*                          | BaTaO <sub>2</sub> N                                                            | 4.111                                 | 69.487                                   | 1.49 (Γ-Γ)                |
| BTON:Al<br>(50 at.%)           | BaTa <sub>0.5</sub> Al <sub>0.5</sub> O <sub>2</sub> N                          | 4.050; 4.050; 4.033                   | 66.151                                   | 1.61(M-Γ); 1.66<br>(Γ-Γ)  |
| BTON:Mg<br>(50 at.%)           | BaTa <sub>0.5</sub> Mg <sub>0.5</sub> O <sub>2</sub> N                          | 4.071; 4.071; 4.232                   | 70.137                                   | 2.01(M-Γ);<br>2.02(Γ-Γ)   |
| BTON:Al:Mg<br>(25:25 at.%)     | BaTa <sub>0.5</sub> Al <sub>0.25</sub> Mg <sub>0.25</sub> O <sub>2</sub> N      | 4.073; 4.099; 4.108                   | 68.584                                   | 1.44 (X-Y);<br>1.84 (Γ-Γ) |
| BTON:Al:Mg<br>(37.5:12.5 at.%) | BaTa <sub>0.5</sub> Al <sub>0.375</sub> Mg <sub>0.125</sub> O <sub>2</sub><br>N | 4.063; 4.063; 4.088                   | 67.485                                   | 1.36 (Γ-Γ)                |
| BTON:Al:Mg<br>(12.5:37.5 at.%) | BaTa <sub>0.5</sub> Al <sub>0.125</sub> Mg <sub>0.375</sub> O <sub>2</sub><br>N | 4.065; 4.065; 4.184                   | 69.137                                   | 1.54 (Γ-Γ)                |

\*M. Hojamberdiev, R. Vargas, Z.C. Kadirova, K. Kato, H. Sena, A.G. Krasnov, A. Yamakata, K. Teshima, M. Lerch, Unfolding the Role of *B* Site-Selective Doping of Aliovalent Cations on Enhancing Sacrificial Visible Light-Induced Photocatalytic H<sub>2</sub> and O<sub>2</sub> Evolution over BaTaO<sub>2</sub>N, *ACS Catal.* **2022**, *12*, 1403–1414.

**Table S2.** Calculated effective masses of electrons and holes in pristine and (co)substituted BaTaO<sub>2</sub>N models along specific directions in the reciprocal space.

| Model                          | direction   | $m_e^*/m_0$            |                        |                        | $m_h^*/m_0$            |                        |                        |
|--------------------------------|-------------|------------------------|------------------------|------------------------|------------------------|------------------------|------------------------|
|                                |             | $\Gamma \rightarrow X$ | $\Gamma \rightarrow M$ | $\Gamma \rightarrow R$ | $\Gamma \rightarrow X$ | $\Gamma \rightarrow M$ | $\Gamma \rightarrow R$ |
| BTON (HSE12s)                  | calculation | 0.363                  | 0.449                  | 0.374                  | 0.535                  | 0.238                  | 0.233                  |
|                                | average     | 0.395                  |                        |                        | 0.335                  |                        |                        |
|                                | direction   | $\Gamma \rightarrow X$ | $\Gamma \rightarrow M$ | $\Gamma \rightarrow R$ | $\Gamma \rightarrow X$ | $\Gamma \rightarrow M$ | $\Gamma \rightarrow R$ |
| BTON:Al<br>(50 at.%)           | calculation | 0.306                  | 0.324                  |                        | 1.017                  |                        | 1.599                  |
|                                | average     | 0.315                  |                        |                        | 1.308                  |                        |                        |
|                                | direction   | $\Gamma \rightarrow X$ | $\Gamma \rightarrow M$ |                        | $M \rightarrow X$      |                        | $M \rightarrow \Gamma$ |
| BTON:Mg<br>(50 at.%)           | calculation | 0.320                  | 0.328                  |                        | 1.254                  |                        | 1.492                  |
|                                | average     | 0.324                  |                        |                        | 1.373                  |                        |                        |
|                                | direction   | $\Gamma \rightarrow X$ | $\Gamma \rightarrow M$ |                        | $M \rightarrow X$      |                        | $M \rightarrow \Gamma$ |
| BTON:Al:Mg<br>(25:25 at.%)     | calculation |                        | 0.308                  |                        | 0.628                  |                        | 7.618                  |
|                                | average     |                        | 0.308                  |                        |                        | 4.123                  |                        |
|                                | direction   |                        | $Y \rightarrow S$      |                        | $X \rightarrow \Gamma$ |                        | $X \rightarrow S$      |
| BTON:Al:Mg<br>(37.5:12.5 at.%) | calculation | 0.335                  | 0.338                  |                        | 1.090                  | 1.223                  | 0.908                  |
|                                | average     | 0.336                  |                        |                        | 1.074                  |                        |                        |
|                                | direction   | $\Gamma \rightarrow X$ | $\Gamma \rightarrow M$ |                        | $\Gamma \rightarrow X$ | $\Gamma \rightarrow M$ | $\Gamma \rightarrow Z$ |
| BTON:Al:Mg<br>(12.5:37.5 at.%) | calculation | 0.342                  | 0.347                  |                        | 1.840                  | 1.895                  | 3.195                  |
|                                | average     | 0.345                  |                        |                        | 2.310                  |                        |                        |
|                                | direction   | $\Gamma \rightarrow X$ | $\Gamma \rightarrow M$ |                        | $\Gamma \rightarrow X$ | $\Gamma \rightarrow M$ | $\Gamma \rightarrow Z$ |

**Table S3.** Details of the calculation of the band edge potentials by DFT.

| Parameter/<br>Element                            | Ba                   | Ta                                                     | O                                                      | N                                                                             | Al                                                                              | Mg                                                                              |        |        |        |
|--------------------------------------------------|----------------------|--------------------------------------------------------|--------------------------------------------------------|-------------------------------------------------------------------------------|---------------------------------------------------------------------------------|---------------------------------------------------------------------------------|--------|--------|--------|
| Electron<br>affinities, eV*                      | -0.50                | 0.32                                                   | 1.46                                                   | 0.07                                                                          | 0.46                                                                            | -0.15                                                                           |        |        |        |
| First ionization<br>energies, eV*                | 5.20                 | 7.89                                                   | 13.62                                                  | 14.53                                                                         | 5.99                                                                            | 7.65                                                                            |        |        |        |
| Compound                                         | BaTaO <sub>2</sub> N | BaTa <sub>0.5</sub> Al <sub>0.5</sub> O <sub>2</sub> N | BaTa <sub>0.5</sub> Mg <sub>0.5</sub> O <sub>2</sub> N | BaTa <sub>0.5</sub> Al <sub>0.25</sub> Mg <sub>0.25</sub> O <sub>2</sub><br>N | BaTa <sub>0.5</sub> Al <sub>0.375</sub> Mg <sub>0.125</sub> O <sub>2</sub><br>N | BaTa <sub>0.5</sub> Al <sub>0.125</sub> Mg <sub>0.375</sub> O <sub>2</sub><br>N |        |        |        |
| Electronegativity<br>of<br>semiconductor, $\chi$ | 5.254                | 5.129                                                  | 5.207                                                  | 5.168                                                                         | 5.148                                                                           | 5.187                                                                           |        |        |        |
| Electronic<br>transition type                    | direct               | indirect                                               | direct                                                 | indirect                                                                      | direct                                                                          | direct                                                                          | direct | direct | direct |
| $E_g$ , eV                                       | 1.49                 | 1.61                                                   | 1.66                                                   | 2.01                                                                          | 1.36                                                                            | 1.54                                                                            | 1.84   | 1.54   | 1.36   |
| $E_{CB}$ , eV                                    | 0.01                 | -0.18                                                  | 0.20                                                   | -0.30                                                                         | 0.03                                                                            | -0.08                                                                           | -0.25  | -0.08  | -0.03  |
| $E_{VB}$ , eV                                    | 1.50                 | 1.43                                                   | 1.46                                                   | 1.71                                                                          | 1.33                                                                            | 1.46                                                                            | 1.59   | 1.46   | 1.33   |

\*R.G. Pearson, Absolute Electronegativity and Hardness: Application to Inorganic Chemistry, *Inorg. Chem.* 27 (1988) 734–740.

**Table S4.** Adsorption energies of water and methanol molecules on the BaTaO<sub>2</sub>N (110) surfaces with Al-, Mg-, and Al-Mg (co)substitution.

| Structures (adsorbate)                              | Mg,<br>% | Al,<br>% | $E_{\text{ads}}$ ,<br>kcal·mol <sup>-1</sup> | Water:<br>$dE_{\text{ads}}/dN_i$ ,<br>kcal·mol <sup>-1</sup> | Methanol:<br>$dE_{\text{ads}}/dN_i$ ,<br>kcal·mol <sup>-1</sup> |
|-----------------------------------------------------|----------|----------|----------------------------------------------|--------------------------------------------------------------|-----------------------------------------------------------------|
| BaTaO <sub>2</sub> N<br>(water adsorption)          | 5        | 0        | -67.18                                       | -2.26                                                        |                                                                 |
|                                                     | 2.5      | 2.5      | -68.79                                       | -2.34                                                        |                                                                 |
|                                                     | 2.5      | 2.5      | -68.95                                       | -2.37                                                        |                                                                 |
|                                                     | 0        | 5        | -71.10                                       | -2.67                                                        |                                                                 |
|                                                     | 0        | 0        | -65.92                                       | -2.53                                                        |                                                                 |
|                                                     | 1.5      | 3.5      | -69.57                                       | -2.34                                                        |                                                                 |
|                                                     | 3.5      | 1.5      | -67.49                                       | -2.52                                                        |                                                                 |
| BaTaO <sub>2</sub> N<br>(water-methanol adsorption) | 5        | 0        | -73.16                                       | -2.56                                                        | -5.23                                                           |
|                                                     | 2.5      | 2.5      | -76.86                                       | -2.49                                                        | -6.14                                                           |
|                                                     | 0        | 5        | -78.81                                       | -2.69                                                        | -5.25                                                           |
|                                                     | 0        | 0        | -72.73                                       | -2.29                                                        | -5.04                                                           |
|                                                     | 2.5      | 2.5      | -75.37                                       | -2.33                                                        | -4.95                                                           |
|                                                     | 1.5      | 3.5      | -76.79                                       | -2.58                                                        | -5.62                                                           |
|                                                     | 3.5      | 1.5      | -74.94                                       | -2.41                                                        | -5.62                                                           |

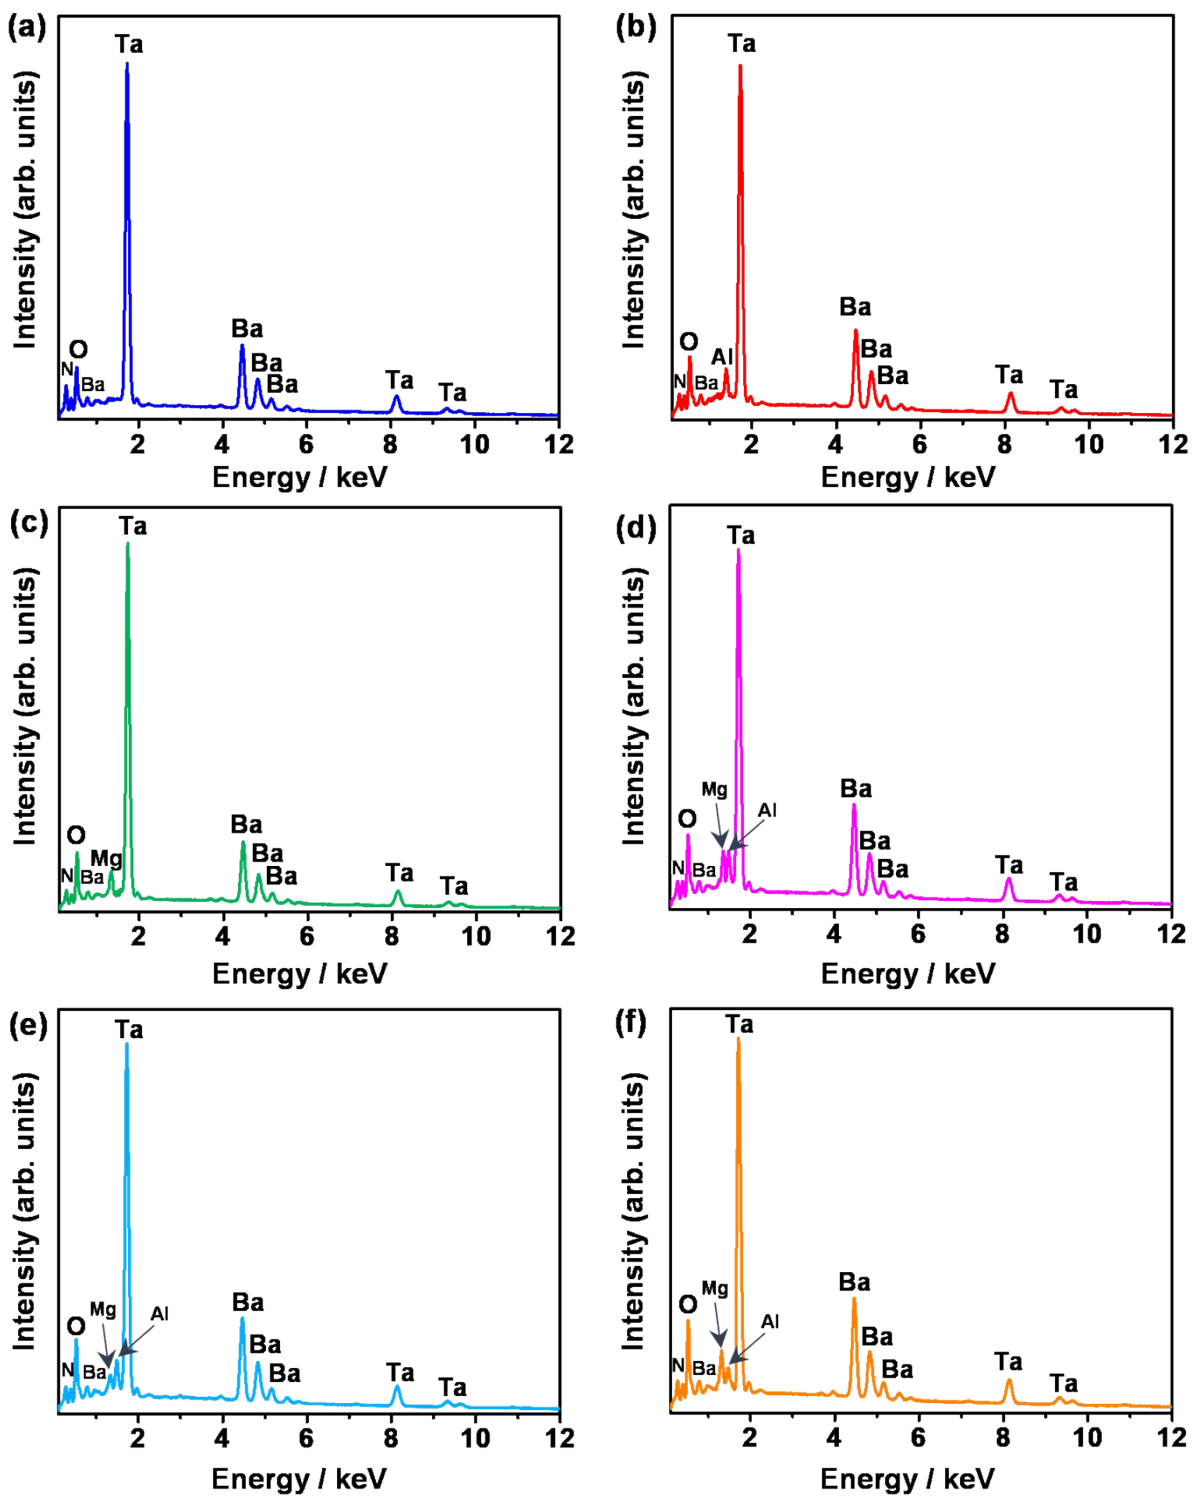

**Figure S1.** EDX spectra of BTON1 (a), BTON2 (b), BTON3 (c), BTON4 (d), BTON5 (e), and BTON6 (f).

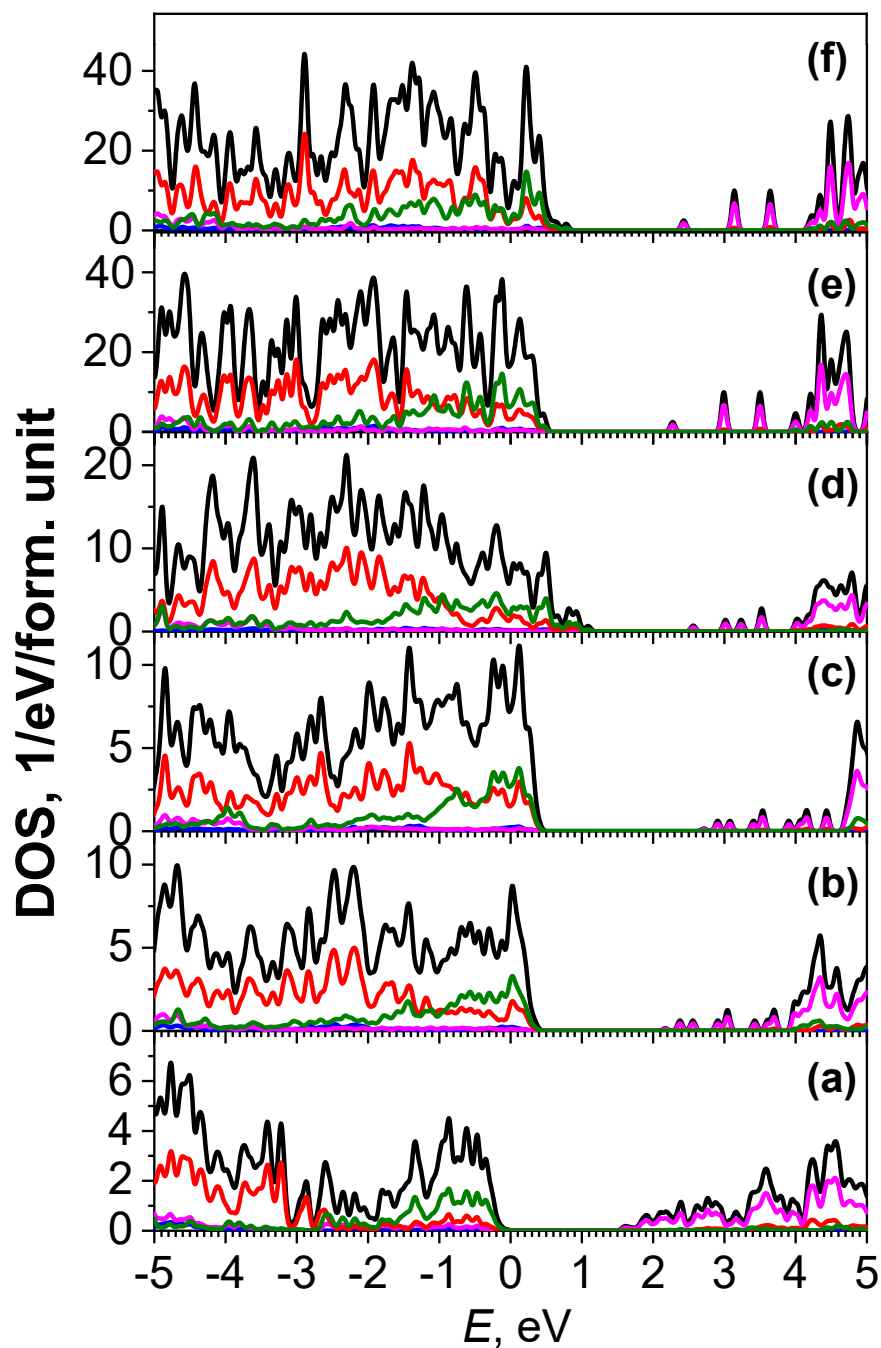

**Figure S2.** Total and partial density of states (a) BTON [32], (b) BTON:Al (50 at.%), (c) BTON:Mg (50 at.%), (d) BTON:Al:Mg (25:25 at.%), (e) BTON:Al:Mg (37.5:12.5 at.%), and (f) BTON:Al:Mg (12.5:37.5 at.%). The Fermi level is set at 0 eV.

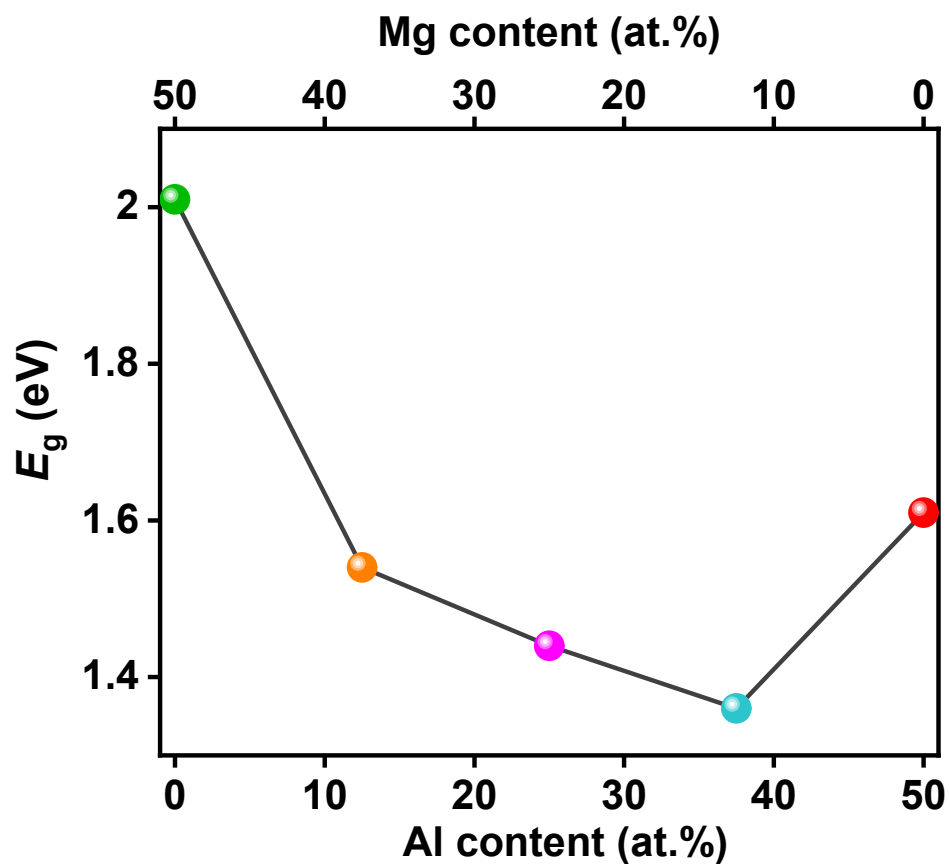

**Figure S3.** DFT-HSE12s-predicted band gap values of pristine and (co)substituted BaTaO<sub>2</sub>N models as functions of Al and Mg contents.



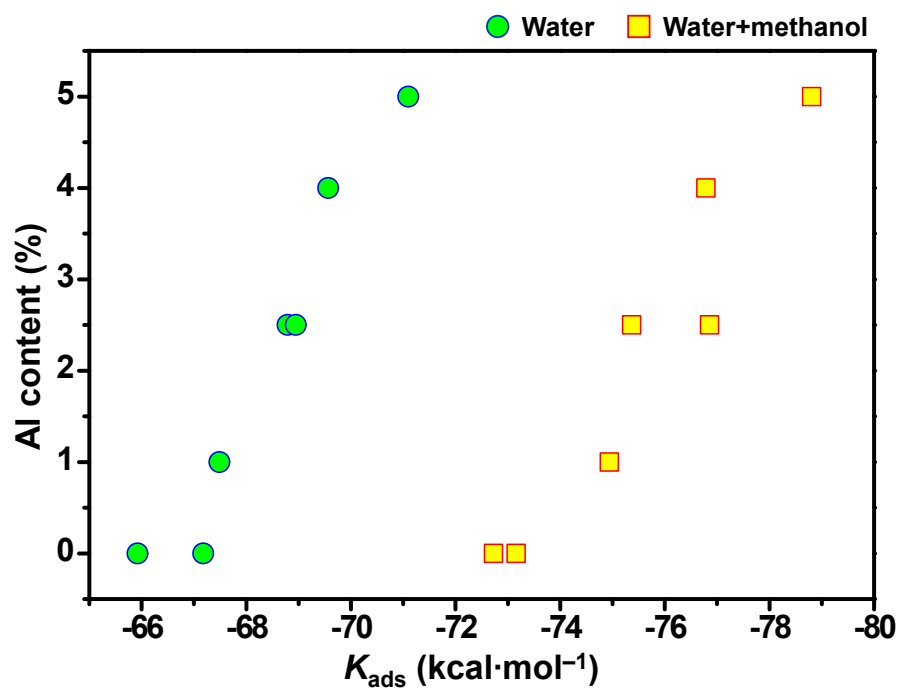

**Figure S4.** Effect of aluminum substitution on adsorption energy of water and water+methanol molecules on the BaTaO<sub>2</sub>N (110) surfaces.
